# Supplementary material for: Application of mydriasis and eye steering in ultrawide field imaging for detecting peripheral retinal lesions in myopic patients
Source: HighWire-hosted journal article supplement (doi:10.1136/bjophthalmol-2021-319809), 2022-03-03
Supplement: bjophthalmol-2021-319809supp001_data_supplement.pdf [file bjophthalmol-2021-319809supp001_data_supplement.pdf]

Online Supplemental Figure 1. Distribution of peripheral retinal lesions. OD, Right eyes; OS, Left eyes; H1, Round holes; H2, Atrophic holes; H3, Horseshoe tears; L, Lattice degeneration; P, Pigmentary degeneration; S, Snail track degeneration.

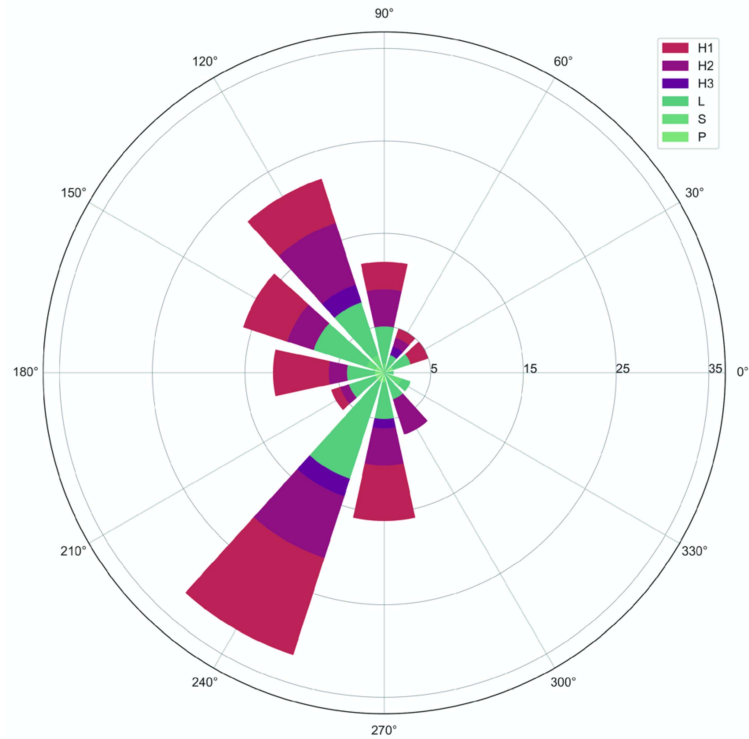

OD Lesions

A

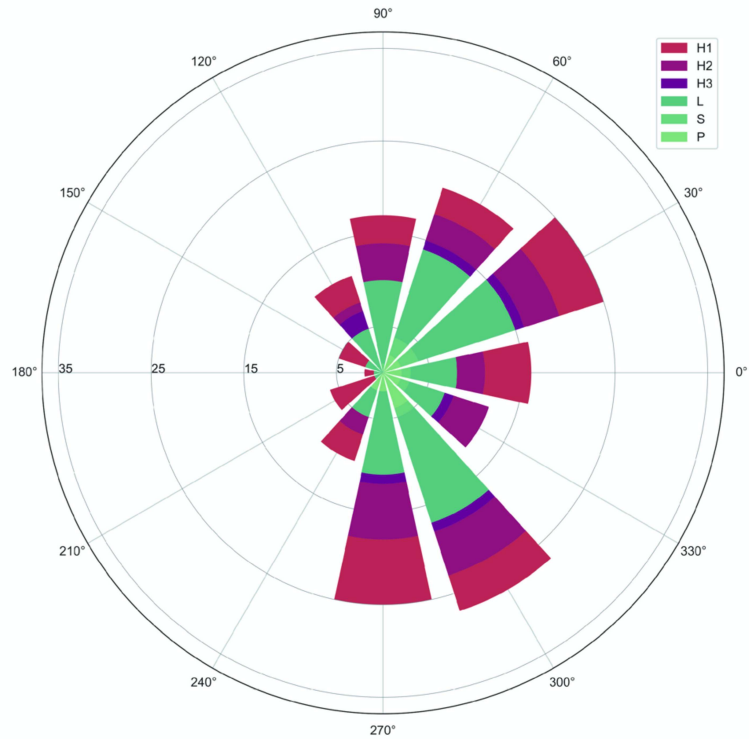

OS Lesions

B

Online Supplemental Table 1. The detection of peripheral retinal lesions of different axial length groups

| Axial Length   |                                          | P value                                          |                                           |                                                      |                                                  |                                                                   |                                                           |                                                                |                                                                        |
|----------------|------------------------------------------|--------------------------------------------------|-------------------------------------------|------------------------------------------------------|--------------------------------------------------|-------------------------------------------------------------------|-----------------------------------------------------------|----------------------------------------------------------------|------------------------------------------------------------------------|
|                |                                          | Non-mydriatric<br>Optomap<br>Standard<br>(95%CI) | Mydriatric Optomap<br>Standard<br>(95%CI) | Non-mydriatric<br>Optomap<br>eye-steering<br>(95%CI) | Mydriatric<br>Optomap<br>eye-steering<br>(95%CI) | Non-<br>mydriatric<br>Optomap<br>Standard<br>vs. Eye-<br>steering | Mydriatric<br>Optomap<br>Standard<br>vs. Eye-<br>steering | Standard<br>Optomap<br>Non-<br>mydriatric<br>vs.<br>Mydriatric | Eye-<br>steering<br>Optomap<br>Non-<br>mydriatric<br>vs.<br>Mydriatric |
| <26.00 mm      | <b>Eyes with lesions</b>                 | <b>32.35%</b><br>(17.39%,50.53%)                 | <b>41.18%</b><br>(26.47%,57.65%)          | <b>67.65%</b><br>(49.47%,82.61%)                     | <b>79.41%</b><br>(62.10%,91.30%)                 | <b>&lt;0.001</b>                                                  | <b>&lt;0.001</b>                                          | NS                                                             | NS                                                                     |
|                | Eyes with lesions<br>needed treatment    | 31.03%<br>(15.28%,50.83%)                        | 37.93%<br>(22.12%,56.80%)                 | 72.41%<br>(52.76%,87.27%)                            | 75.86%<br>(56.46%,89.70%)                        | <0.001                                                            | <0.001                                                    | NS                                                             | NS                                                                     |
|                | Eyes with lesions<br>needed no treatment | 17.65%<br>(3.80%,43.43%)                         | 35.29%<br>(14.21%,61.67%)                 | 64.71%<br>(38.33%,85.79%)                            | 82.35%<br>(56.57%,96.20%)                        | 0.001                                                             | <0.01                                                     | NS                                                             | NS                                                                     |
| 26.00-28.00 mm | <b>Eyes with lesions</b>                 | <b>43.40%</b><br>(30.60%,57.14%)                 | <b>54.72%</b><br>(40.88%,67.86%)          | <b>81.13%</b><br>(68.03%,90.56%)                     | <b>92.45%</b><br>(81.79%,97.91%)                 | <b>&lt;0.001</b>                                                  | <b>&lt;0.001</b>                                          | <b>&lt;0.05</b>                                                | <b>&lt;0.01</b>                                                        |
|                | Eyes with lesions<br>needed treatment    | 38.30%<br>(25.67%,52.73%)                        | 48.94%<br>(35.37%,62.66%)                 | 80.85%<br>(66.74%,90.85%)                            | 97.87%<br>(88.71%,99.95%)                        | <0.001                                                            | <0.001                                                    | <0.05                                                          | <0.01                                                                  |
|                | Eyes with lesions<br>needed no treatment | 37.93%<br>(21.84%,57.20%)                        | 48.28%<br>(30.98%,65.99%)                 | 75.86%<br>(56.42%,88.41%)                            | 86.21%<br>(68.01%,94.84%)                        | <0.001                                                            | <0.001                                                    | NS                                                             | NS                                                                     |
| >28.00mm       | <b>Eyes with lesions</b>                 | <b>40.91%</b><br>(26.34%,56.75%)                 | <b>56.82%</b><br>(41.03%,71.65%)          | <b>75.00%</b><br>(59.66%,86.81%)                     | <b>84.09%</b><br>(69.93%,93.36%)                 | <b>&lt;0.001</b>                                                  | <b>0.001</b>                                              | <b>&lt;0.05</b>                                                | NS                                                                     |
|                | Eyes with lesions<br>needed treatment    | 34.38%<br>(18.57%,53.19%)                        | 53.13%<br>(34.74%,70.91%)                 | 78.13%<br>(60.03%,90.72%)                            | 90.63%<br>(74.98%,98.02%)                        | <0.001                                                            | <0.001                                                    | <0.05                                                          | NS                                                                     |
|                | Eyes with lesions<br>needed no treatment | 50.00%<br>(27.20%,72.80%)                        | 55.00%<br>(35.48%,73.10%)                 | 75.00%<br>(50.90%,91.34%)                            | 75.00%<br>(50.53%,89.81%)                        | <0.05                                                             | <0.05                                                     | NS                                                             | NS                                                                     |
